# Supplementary material
Source: publisher figshare collection journal article supplement (https://karger.figshare.com/ndownloader/files/14020787)
Supplement: Supplementary file 1 [file 14020787]

Supplementary Material, Table 1. Search results using Ovid Medline, <1946 to Present with Daily Update>.

| **#** | **Search Statement** | **Results** |
| --- | --- | --- |
| 1 | Inflammatory Bowel Diseases/ | 18098 |
| 2 | Inflammatory bowel disease*.tw. | 33051 |
| 3 | IBD.tw. | 15766 |
| 4 | Crohn Disease/ | 35353 |
| 5 | Crohn's disease*.tw. | 32501 |
| 6 | Colitis, Ulcerative/ | 31413 |
| 7 | Ulcerative colitis.tw. | 30081 |
| 8 | 1 or 2 or 3 or 4 or 5 or 6 or 7 | 87718 |
| 9 | WORKPLACE/ | 18685 |
| 10 | workplace*.tw. | 29407 |
| 11 | work place*.tw. | 2213 |
| 12 | 9 or 10 or 11 | 40873 |
| 13 | EMPLOYMENT/ | 42335 |
| 14 | employment.tw. | 41884 |
| 15 | 13 or 14 | 72195 |
| 16 | UNEMPLOYMENT/ | 6215 |
| 17 | unemployment.tw. | 7926 |
| 18 | 16 or 17 | 11192 |
| 19 | EMPLOYMENT, SUPPORTED/ | 1059 |
| 20 | Job Satisfaction/ | 22390 |
| 21 | job satis*.tw. | 6264 |
| 22 | 19 or 20 or 21 | 24991 |
| 23 | PRESENTEEISM/ | 123 |
| 24 | presenteeism.tw. | 651 |
| 25 | 23 or 24 | 672 |
| 26 | ABSENTEEISM/ | 8380 |
| 27 | absenteeism.tw. | 4330 |
| 28 | 26 or 27 | 10383 |
| 29 | 12 or 15 or 18 or 22 or 25 or 28 | 143778 |
| 30 | 8 and 29 | 195 |
